# Supplementary material for: Unfolding the mysteries of heterogeneity from a high-resolution perspective: integration analysis of single-cell multi-omics and spatial omics revealed functionally heterogeneous cancer cells in ccRCC
Source: publisher site journal article supplement (doi:10.18632/aging.205974), 2024-06-26
Supplement: Supplementary file [file aging-v16i13-205974-supplementary-material-SD2.pdf]

## SUPPLEMENTARY TABLES

**Supplementary Table 1. Data source and quality control in this study.**

| Data type | Tissue type   | Database | Data ID     | Sample ID                                      | Sample number | Quality control                                                                                                                | Cell number |
|-----------|---------------|----------|-------------|------------------------------------------------|---------------|--------------------------------------------------------------------------------------------------------------------------------|-------------|
| scRNA     | ccRCC         | SRA      | PRJNA768891 | SRR16213611, SRR16213612, SRR16213614          | 3             | minGene>200, maxGene<5000, pctMT<10                                                                                            | 27644       |
| scRNA     | Normal Kidney | GEO      | GSE131685   | GSM4145204, GSM4145205, GSM4145206             | 3             | minGene>200, maxGene<2500, pctMT<30                                                                                            | 22960       |
| scATAC    | ccRCC         | SRA      | PRJNA768891 | SRR16213608, SRR16213609, SRR16213610          | 3             | peak_region_fragments > 1000, peak_region_fragments < 20000, blacklist_ratio < 0.05, nucleosome_signal < 4, TSS.enrichment > 3 | 26301       |
| stRNA     | ccRCC         | GEO      | GSE175540   | GSM5924033, GSM5924035, GSM5924037, GSM5924040 | 4             | minGene>300, pctMT<30                                                                                                          | 17871       |
| bulk-RNA  | ccRCC         | GDC-TCGA | -           | -                                              | 490           | -                                                                                                                              | -           |

**Supplementary Table 2. Functional enrichment analysis of HALMARK term for characteristic gene of meta programs.**

| ID                                | GeneRatio | geneID                                                                                                         | Count | Cluster              |
|-----------------------------------|-----------|----------------------------------------------------------------------------------------------------------------|-------|----------------------|
| GLYCOLYSIS                        | 9/36      | CYB5A/ENO1/MIF/TP11/TXN/CLDN3/GAL3ST1/PGK1/PKM                                                                 | 9     | Metabolism_program   |
| XENOBIOTIC_METABOLISM             | 6/36      | TMEM176B/CYB5A/CYP27A1/SPINT2/PGRMC1/ECH1                                                                      | 6     | Metabolism_program   |
| REACTIVE_OXYGEN_SPECIES_PATHWAY   | 3/36      | TXN/MGST1/PRDX2                                                                                                | 3     | Metabolism_program   |
| HYPOXIA                           | 5/36      | ENO1/MIF/TP11/GAPDH/PGK1                                                                                       | 5     | Metabolism_program   |
| FATTY_ACID_METABOLISM             | 4/36      | MIF/ACAA2/ALDH1A1/ECH1                                                                                         | 4     | Metabolism_program   |
| INFLAMMATORY_RESPONSE             | 25/9      | CYBB/PLAUR/IL1B/IL10RA/CD48/GPR183/PDE4B/TNFRSF1B/ADGRE1                                                       | 9     | Inflammation_program |
| KRAS_SIGNALING_UP                 | 25/9      | FCER1G/CTSS/PLAUR/LAPTM5/CD37/IL1B/IL10RA/CLEC4A/TNFRSF1B                                                      | 9     | Inflammation_program |
| IL2_STAT5_SIGNALING               | 6/25      | FGL2/CD86/IL10RA/CD83/CD48/TNFRSF1B                                                                            | 6     | Inflammation_program |
| ALLOGRAFT_REJECTION               | 6/25      | SRGN/CTSS/CD86/IL1B/LY86/SPI1                                                                                  | 6     | Inflammation_program |
| TNFA_SIGNALING_VIA_NFKB           | 6/25      | PLAUR/IL1B/CD83/GPR183/PDE4B/PLEK                                                                              | 6     | Inflammation_program |
| COMPLEMENT                        | 5/25      | FCER1G/CTSS/PLAUR/FCN1/PLEK                                                                                    | 5     | Inflammation_program |
| INTERFERON_GAMMA_RESPONSE         | 5/25      | IF130/FGL2/CD86/IL10RA/PDE4B                                                                                   | 5     | Inflammation_program |
| EPITHELIAL_MESENCHYMAL_TRANSITION | 18/23     | COL1A2/COL1A1/FN1/FAP/BGN/SPARC/IGFBP2/CTHRC1/COL5A1/VEGFC/ COL3A1/COL6A3/COL6A2/MMP2/HTRA1/PTHLH/TIMP1/SPOCK1 | 18    | EMT_program          |
| COAGULATION                       | 7/23      | FN1/SPARC/PLAU/MMP2/C1R/HTRA1/TIMP1                                                                            | 7     | EMT_program          |
| MYOGENESIS                        | 6/23      | COL1A1/SPARC/IGFBP7/COL3A1/COL6A3/COL6A2                                                                       | 6     | EMT_program          |
| UV_RESPONSE_DN                    | 4/23      | COL1A2/COL1A1/IGFBP5/COL3A1                                                                                    | 4     | EMT_program          |
| ANGIOGENESIS                      | 2/23      | COL3A1/TIMP1                                                                                                   | 2     | EMT_program          |

**Supplementary Table 3. Top 50 specific characteristic gene of meta programs.**

| <b>Inflammatory meta programs</b> | <b>EMT meta programs</b> | <b>Metabolism meta programs</b> |
|-----------------------------------|--------------------------|---------------------------------|
| LILRB2                            | COL1A2                   | TMEM176B                        |
| IFI30                             | COL1A1                   | TMEM176A                        |
| FCER1G                            | FN1                      | NAT8                            |
| AIF1                              | FAP                      | ANXA4                           |
| TMSB4X                            | MFAP4                    | CYB5A                           |
| SRGN                              | BGN                      | ENO1                            |
| S100A4                            | AC110285.2               | MIF                             |
| TYROBP                            | SPARC                    | CXCL14                          |
| CYBB                              | CPE                      | IMPA2                           |
| HLA.DRA                           | GGT5                     | TPI1                            |
| LYZ                               | IGFBP7                   | FXVD2                           |
| CTSS                              | IGFBP2                   | PEBP1                           |
| PLAUR                             | SFRP2                    | CLU                             |
| FGL2                              | PPP1R26.AS1              | TMEM37                          |
| CSTA                              | MEDAG                    | ACAA2                           |
| CD86                              | IGFBP5                   | CYP27A1                         |
| LAPTM5                            | CTHRC1                   | GAPDH                           |
| CORO1A                            | COL5A1                   | HINT1                           |
| COTL1                             | PLTP                     | UGT2B7                          |
| STX11                             | PLAU                     | LY6E                            |
| MS4A6A                            | VEGFC                    | ALDH1A1                         |
| HLA.DPA1                          | COL3A1                   | TXN                             |
| ARHGDI B                          | AL359541.1               | CLDN3                           |
| HLA.DPB1                          | GJB2                     | RACK1                           |
| GMFG                              | OLFM2                    | SPINT2                          |
| CD37                              | SLC28A3                  | BBOX1                           |
| CLEC7A                            | CLEC3B                   | BNIP3                           |
| IL1B                              | HAS2.AS1                 | TNFAIP6                         |
| LY86                              | COL10A1                  | GAL3ST1                         |
| IL10RA                            | COL6A3                   | SLC17A3                         |
| SPI1                              | CREB3L1                  | NDUFA4L2                        |
| LILRB4                            | COL6A2                   | PGK1                            |
| CLEC4A                            | ARL4C                    | PDZK1IP1                        |
| CD83                              | AC124067.2               | LINP1                           |
| CD48                              | TMC3.AS1                 | PKM                             |
| CD53                              | AC020910.2               | SMIM24                          |
| LST1                              | MMP2                     | PGRMC1                          |
| FCN1                              | POPDC3                   | AZGP1                           |
| GPR183                            | C1R                      | CUBN                            |
| PDE4B                             | HTRA1                    | MGST1                           |
| PLEK                              | GAP43                    | ITM2B                           |
| HLA.DRB1                          | PTHLH                    | SLC3A1                          |
| TNFRSF1B                          | P4HA3                    | PRDX2                           |
| C1orf162                          | KRTAP5.10                | KRT18                           |
| VSTM1                             | TIMP1                    | RTN4                            |
| BTK                               | SPOCK1                   | SNHG29                          |
| LILRA5                            | LGI2                     | MPC2                            |
| ABI3                              | RAB39A                   | COX6A1                          |
| PILRA                             | RRS1.AS1                 | ECH1                            |
| ADGRE1                            | DPT                      | ACMSD                           |
